# Supplementary material for: Synthesis and application of new silver and sulfur decorated S-doped reduced graphene oxide in ultra-trace analysis of pesticides by ion mobility spectrometry
Source: Royal Society of Chemistry journal article supplement (doi:10.1039/d2ay00852a), 2022-01-01
Supplement: d2ay00852a1.pdf [file d2ay00852a1.pdf]

1 **Synthesis and application of new silver and sulfur decorated S-doped reduced**  
2 **graphene oxide in ultra-trace analysis of pesticides by ion mobility**  
3 **spectrometry**

4 **Sedigheh Rahmani<sup>a</sup>, Behzad Aibaghi<sup>a,\*</sup>**

5 <sup>a</sup> School Of Chemistry, Damghan University, Damghan 3671641167, Iran

6

7 **Optimization of other parameters**

8 *Effect of type and volume of buffer*

9 Acetate, citrate, and Britton-Robinson buffers (pH=5.0) were used to evaluate the effect of buffer  
10 type. According to results in Fig. S6 the acetate buffer was selected as best buffer. Subsequent  
11 experiments were carried out on the volume of the optimum buffer within the range of 0.5–3 mL,  
12 and the best results were attained with 1 mL of acetate buffer with the total concentration of 0.1M  
13 in pH=5.0.

14 *Effect of the sorbent amount*

15 The amount of adsorbent should not be so small that the extraction is not complete and not so high  
16 that it causes high solvent consumption. Therefore, the amount of adsorbent was changed from 8  
17 to 20 mg. Based on the results in Fig. S7, the value of 8 mg was selected as the optimum amount.

18 *Effect of the volume of desorption solvent*

19 The volume of desorbed solvent should be optimized to the minimum possible amount due to the  
20 adverse effects of the solvent organic on the environment. Accordingly, the volume of methanol

21 was changed from 80 to 250  $\mu\text{L}$ . The results of Fig. S8 show that a volume of 80  $\mu\text{L}$  is not sufficient  
22 to extract the analytes from the adsorbent. On the other hand, by increasing the volume of solvent  
23 by more than 100  $\mu\text{L}$ , the extraction efficiency decreases. Therefore, 100  $\mu\text{L}$  was selected as the  
24 optimum volume.

#### 25 *Effect of sorption and desorption time*

26 To obtain a satisfactory adsorption equilibrium, adequate contact time between the adsorbent and  
27 analytes is required. Due to the specific surface area of the adsorbent (Ag/S/S-RGO), the  
28 adsorption process occurred rapidly and 1 min was selected as the best sorption time (Fig. S9). To  
29 ensure complete desorption of pesticides from the sorbent determining suitable desorption time is  
30 critical. Based on the experiments, 2 minutes was also optimized as the best desorption time.

#### 31 *Adsorption capability of Ag/S/S-RGO*

32 To investigate the adsorption capability of Ag/S/S-RGO nanocomposite for various types of  
33 pesticides a series of experiments were done and the absorption capacity of nanocomposite for  
34 different pesticides was determined. Based on the results, adsorption capacity for herbicides  
35 (fenoxaprop: 462, butachlor: 475, hexaflumuron: 731, bensulfuron: 825, and acetochlor: 475 mg  
36  $\text{g}^{-1}$ ), insecticides (amitraz: 950, diazinon: 860 and clofentezine: 350 mg  $\text{g}^{-1}$ ), and fungicides  
37 (carbendazim: 643 mg  $\text{g}^{-1}$ ) were obtained. It should be mentioned that sulfur-containing pesticides  
38 (bensulfuron and diazinon), due to strong interaction with silver nanoparticles are not easily  
39 desorbed from the adsorbent surface.

#### 40 *Reduced ion mobility*

41 Since the mobility and drift time of the analytes in ion mobility spectrometry are affected by the  
42 instrument's drift region temperature (T) and ambient pressure (P) the comparisons are facilitated

43 by reporting a quantity as nearly independent of these variables as possible. In theory, reduced ion  
44 mobility ( $K_0$ ) is a constant which is independent of temperature and pressure for a given compound  
45 in a given buffer gas and is a qualitative indicator of the ion's identity. The  $K_0$  value in IMS is  
46 fundamentally related to the ion's collision cross-section. The reduced ion mobility constant can

47 be calculated by  $K_0 = K \frac{P}{760} \frac{273}{T}$ , where P is the pressure in the drift region in Torr, T is the buffer  
48 gas temperature in Kelvin and K is the ion mobility constant ( $\text{cm}^2 \text{V}^{-1} \text{s}^{-1}$ ). The ion mobility

49 constant is calculated by  $K = \frac{L^2}{V t_d}$ , where L is the length of the drift region in cm, V is the total  
50 voltage drop in volts across the drift region, and  $t_d$  is the time the ion spends traveling the distance  
51 L in seconds<sup>1</sup>. The reduced ion mobility of the SIM, ALA, and HF are calculated and reported in  
52 Table S1.

53

54

55

56

57

58

59

60

61

62

63 **Supplementary Figures and Scheme:**

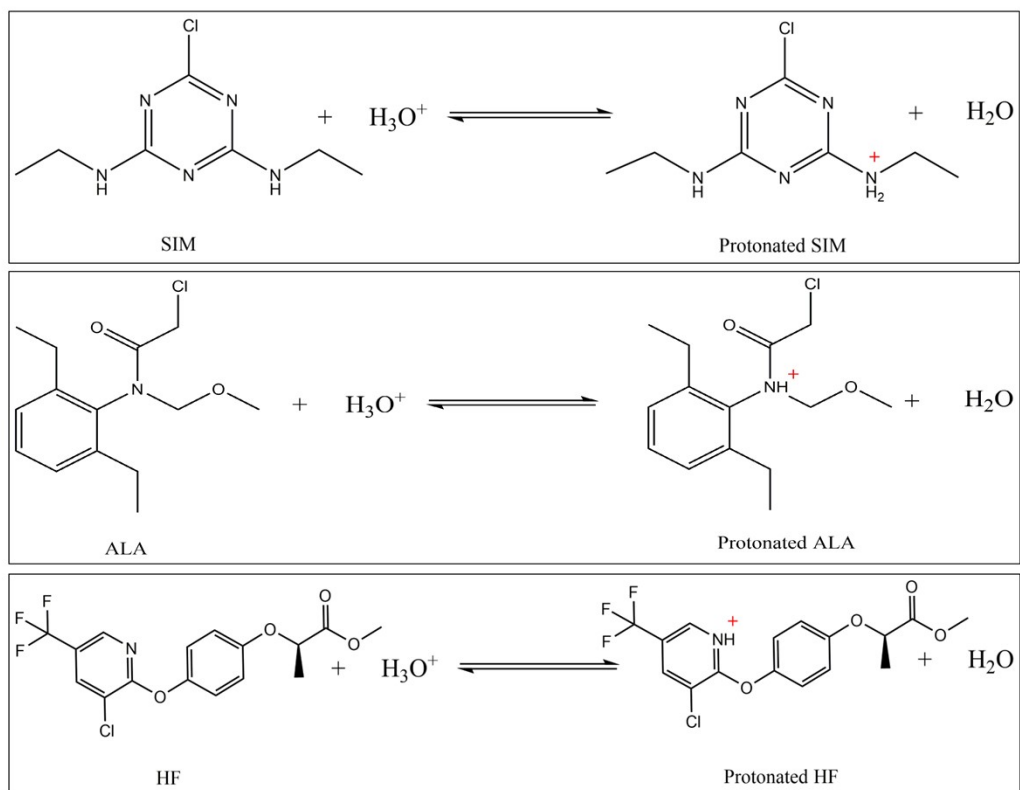

64

65 **Scheme S1. Protonation reaction of simazine, alachlor, and haloxyfop in corona discharge**  
66 **ionization source**

67

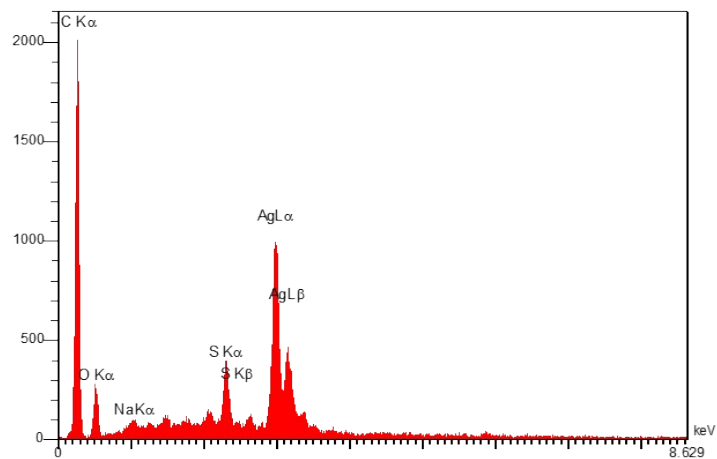

68

69

**Fig. S1.** The EDX spectrum for Ag/S/S-RGO nanocomposite.

70

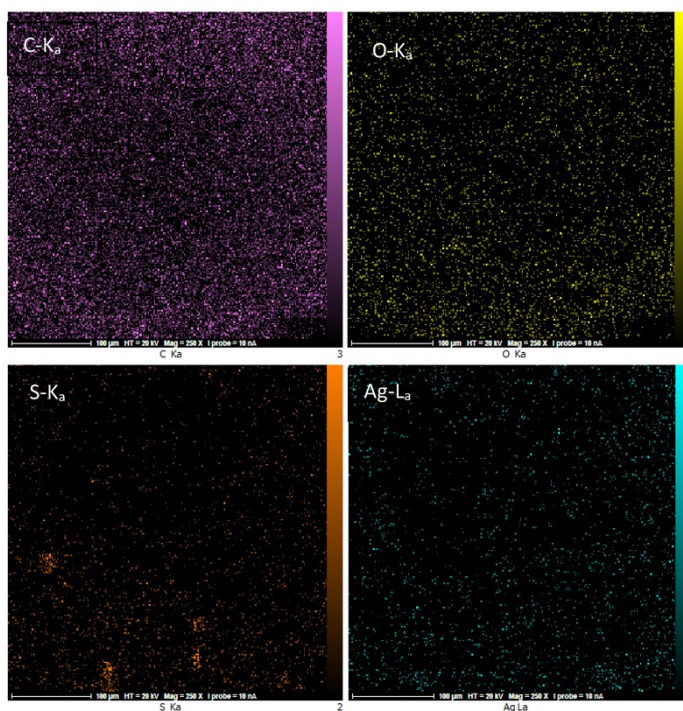

71

72

**Fig. S2.** The EDX map for Ag/S/S-RGO nanocomposite.

73

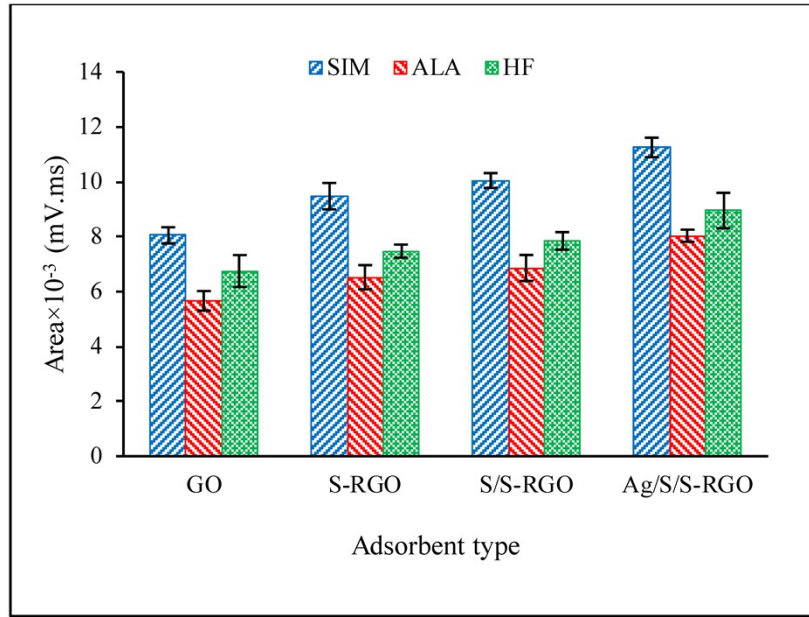

74  
75  
76  
77

**Fig. S3.** Adsorption efficiency study of single and multi-component adsorbents.

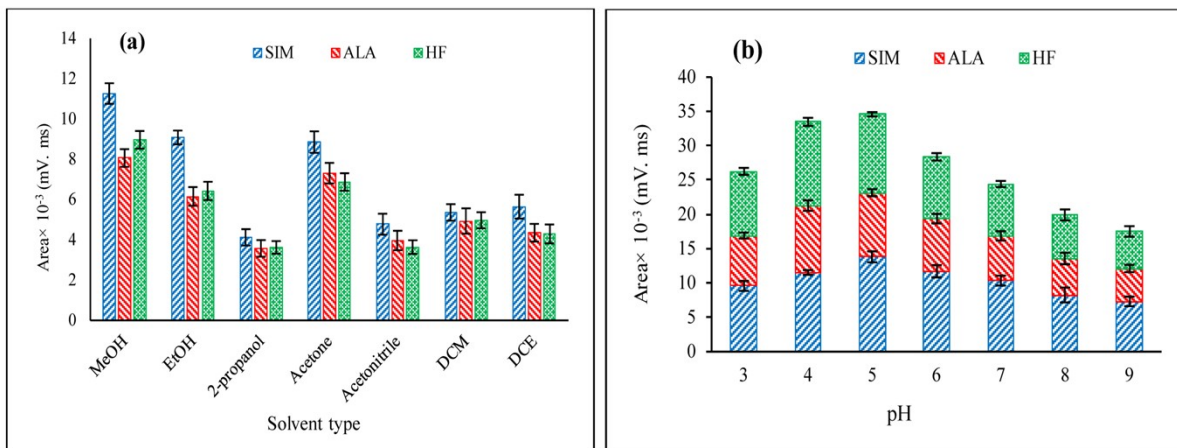

78  
79  
80  
81  
82  
83  
84

**Fig. S4** Effect of **a)** Type of desorption solvent, and **b)** pH on the DSPME method.

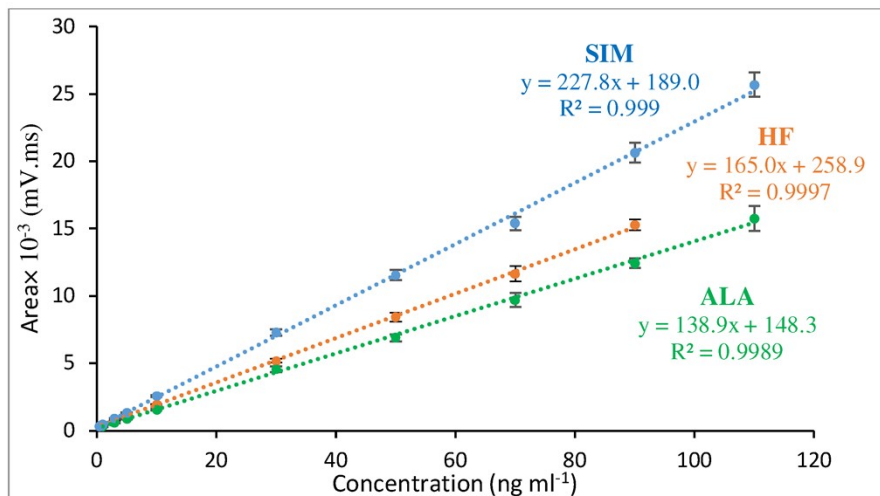

85

86

**Fig. S5.** The calibration plot of simazine, alachlor, and haloxypop

87

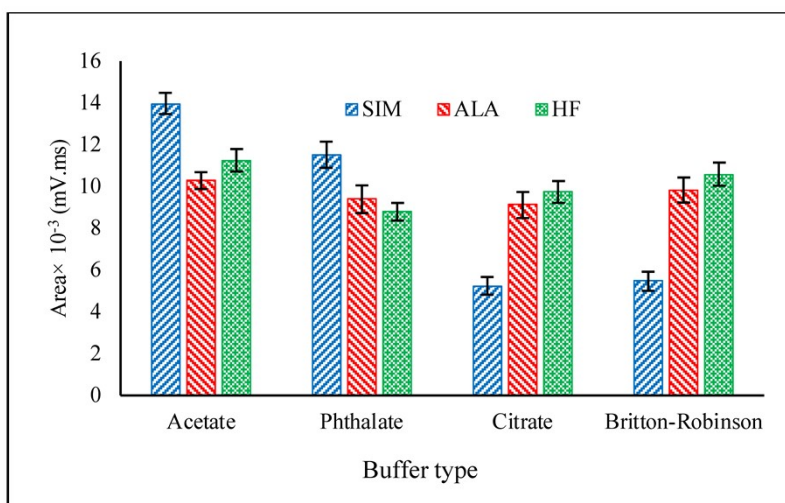

88

89

**Fig. S6.** The effect of buffer type on the extraction efficiency of the DSPME method.

90

91

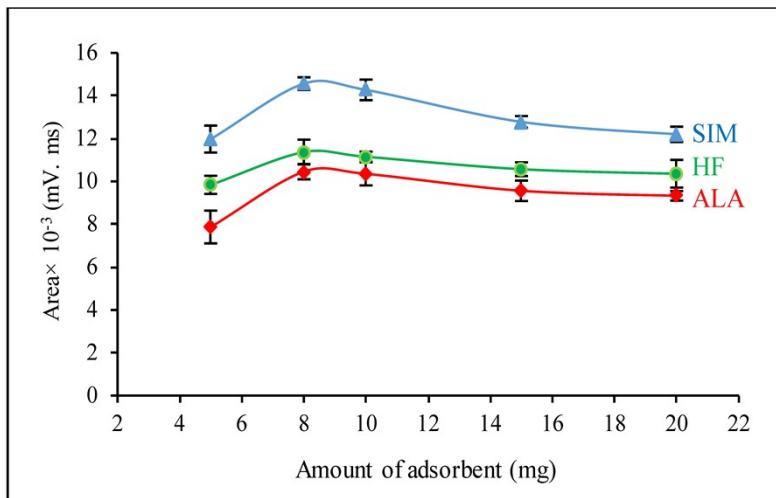

92

93 **Fig. S7.** Effect of the sorbent amount on the simazine, alachlor and haloxyfop extraction.

94

95

96

97

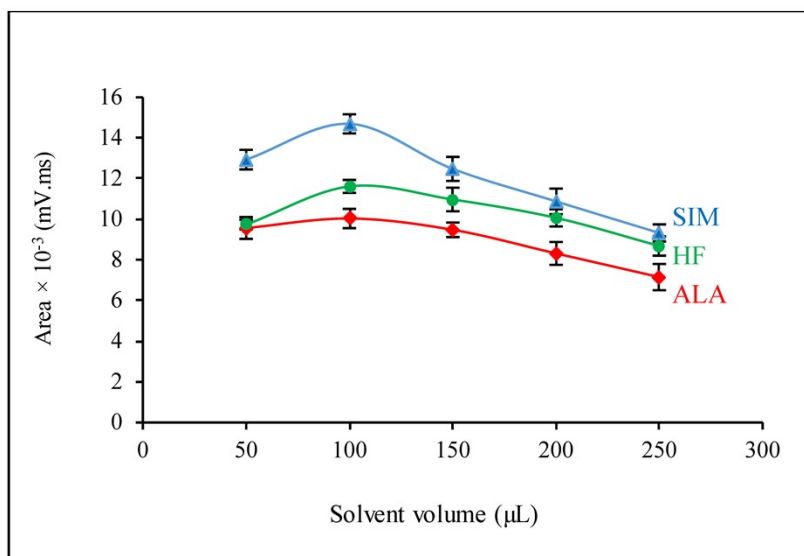

98

99 **Fig. S8.** The effect of desorption solvent volume on the extraction efficiency of the DSPME  
100 method.

101



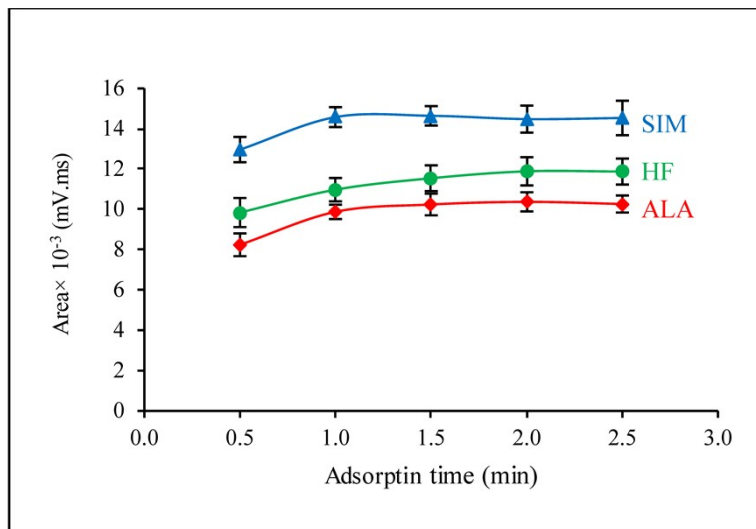

102

103 **Fig. S9.** The effect of sorption time on the extraction efficiency of the DSPME method.

104

105

106

107

108

109 **Supplementary Tables:**

110 **Table S1:** Physicochemical properties of simazine, alachlor, and haloxyfop

| Properties                                 | Simazine<br>(SIM)                               | Alachlor<br>(ALA)                                 | Haloxyfop<br>(HF)                                                |
|--------------------------------------------|-------------------------------------------------|---------------------------------------------------|------------------------------------------------------------------|
| Chemical structure                         |                                                 |                                                   |                                                                  |
| Empirical formula                          | C <sub>7</sub> H <sub>12</sub> ClN <sub>5</sub> | C <sub>14</sub> H <sub>20</sub> ClNO <sub>2</sub> | C <sub>15</sub> H <sub>11</sub> ClF <sub>3</sub> NO <sub>4</sub> |
| Molecular weight<br>(g mol <sup>-1</sup> ) | 201.66                                          | 269.77                                            | 375.73                                                           |
| pK <sub>a</sub>                            | 1.62                                            | 1.2                                               | 2.9                                                              |
| Boiling point (°C)                         | 365.8                                           | 399                                               | 390                                                              |

|                                                              |                    |                    |                    |
|--------------------------------------------------------------|--------------------|--------------------|--------------------|
| Flashpoint (°C)                                              | 175                | 137                | 190                |
| Collision cross section [M+H] <sup>+</sup> (Å <sup>2</sup> ) | 143.0 <sup>2</sup> | 156.4 <sup>2</sup> | 179.9 <sup>3</sup> |
| (K <sub>0</sub> ) <sup>a</sup>                               | 7.98               | 7.32               | 5.72               |

<sup>a</sup>Reduced mobility constant of ion mobility spectrometry

111

112

113

**Table S2.** Optimum instrumental parameters for IMS

| optimum instrumental parameters |                          |
|---------------------------------|--------------------------|
| Injection port temperature      | 260 °C                   |
| Cell temperature                | 200 °C                   |
| Drift voltage                   | 8000 V                   |
| Corona voltage                  | 2500 V                   |
| Carrier gas flow rate           | 400 mL min <sup>-1</sup> |
| Drift gas flow rate             | 800 mL min <sup>-1</sup> |
| Shutter grid pulse width        | 130 μs                   |

114

115

116

117

118

119

**Table S3.** The BET results for Ag/S/S-RGO nanocomposites

| Parameter                                   | Value                                    |
|---------------------------------------------|------------------------------------------|
| V <sub>m</sub> <sup>a</sup> (STP)           | 1.6711 cm <sup>3</sup> g <sup>-1</sup>   |
| a <sub>s,BET</sub> <sup>b</sup>             | 7.2736 m <sup>2</sup> g <sup>-1</sup>    |
| C <sup>c</sup>                              | 113.67                                   |
| Total pore volume (p/p <sub>0</sub> =0.990) | 0.027149 cm <sup>3</sup> g <sup>-1</sup> |
| Mean pore diameter                          | 14.93 nm                                 |

<sup>a</sup>The volume of gas absorbed to form a layer on the surface of the nanocomposite

<sup>b</sup>Specific surface area of the nanocomposite

<sup>c</sup> constant depends on the gas absorption enthalpy

120

121

122 *References:*

123 1 R. Fernández-Maestre, C. S. Harden, R. G. Ewing, C. L. Crawford and H. H. Hill,  
124 *Analyst*, 2010, **135**, 1433.

- 125 2 A. Celma, D. Fabregat-Safont, M. Ibàñez, L. Bijlsma, F. Hernandez and J. V. Sancho,  
126 *Zenodo*, , DOI:10.5281/ZENODO.3966751.
- 127 3 L. Bijlsma, R. Bade, A. Celma, L. Mullin, G. Cleland, S. Stead, F. Hernandez and J. V.  
128 Sancho, *Anal. Chem.*, 2017, **89**, 6583–6589.
- 129
